# Supplementary material
Source: publisher figshare collection journal article supplement (https://asha.figshare.com/articles/dataset/_/28216259)

**Supplemental Material S5.** A video frame of the signer in the CRTT-ASL. Permission to include this picture was given through signed consent by the individual photographed.

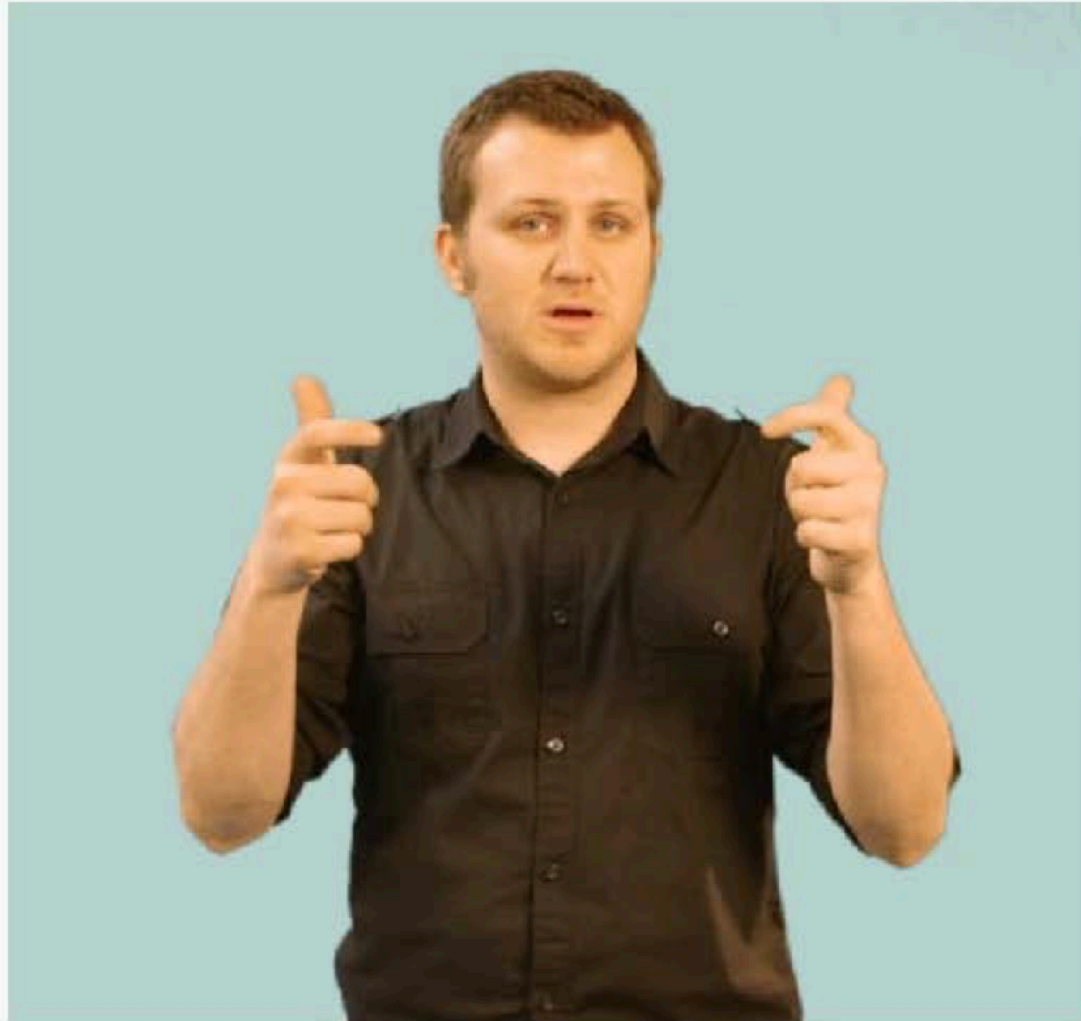

Supplement: Supplementary file 1 [file 1]
