# Supplementary material
Source: publisher figshare collection journal article supplement (https://asha.figshare.com/articles/dataset/_/28216259)
Supplement: Supplementary file 2 [file 1]

**Supplemental Material S10.** Hearing proficient (HP) participant performance on the CRTT-ASL across sessions. Note. \*Scores below the mean minus 1 SEM, established for healthy controls on the CRTT-R-wf score (McNeil et al., 2015). Bolded = CRTT-ASL Session 2 scores that are lower than Session 1.

| Participant | Mean CRTT-<br>ASL Score<br>Timepoint 1<br>(Cutoff = 13.71) | Mean CRTT-<br>ASL Score<br>Timepoint 2<br>(Cutoff = 14.07) | Mean Efficiency<br>ASL Score<br>Timepoint 1<br>(Cutoff = 12.37) | Mean Efficiency<br>ASL Score<br>Timepoint 2<br>(Cutoff = 12.87) |
|-------------|------------------------------------------------------------|------------------------------------------------------------|-----------------------------------------------------------------|-----------------------------------------------------------------|
| HP01        | 12.99*                                                     | 14.25                                                      | 11.50*                                                          | 12.66*                                                          |
| HP02        | 14.32                                                      | 14.46                                                      | 12.89                                                           | 13.17                                                           |
| HN03        | 13.57*                                                     | 14.17                                                      | 12.10*                                                          | 12.80*                                                          |
| HP04        | 13.75                                                      | 13.96*                                                     | 12.29*                                                          | 12.50*                                                          |
| HP05        | 14.31                                                      | 14.59                                                      | 13.02                                                           | 13.47                                                           |
| HP06        | 14.56                                                      | 14.58                                                      | 13.49                                                           | 13.52                                                           |
| HP07        | 13.65*                                                     | 14.15                                                      | 12.08*                                                          | 12.93                                                           |
| HP08        | 14.21                                                      | 14.56                                                      | 12.69                                                           | 13.22                                                           |
| HP09        | 13.98                                                      | 14.52                                                      | 12.67                                                           | 13.26                                                           |
| HP10        | 13.59*                                                     | 13.89*                                                     | 12.15*                                                          | 12.53*                                                          |
| HP11        | 14.11                                                      | 14.28                                                      | 12.72                                                           | 13.07                                                           |
| HP12        | 14.12                                                      | 14.55                                                      | 13.22                                                           | 13.67                                                           |
| HP13        | 14.08                                                      | 14.36                                                      | 13.04                                                           | 13.41                                                           |
| HP14        | 14.30                                                      | 14.44                                                      | 13.05                                                           | 13.36                                                           |
| HP15        | 13.68*                                                     | 14.58                                                      | 12.21*                                                          | 13.14                                                           |
| HP16        | 14.05                                                      | 14.49                                                      | 12.58                                                           | 13.14                                                           |
| HP17        | 14.39                                                      | 14.51                                                      | 12.99                                                           | 13.33                                                           |
| HP18        | 13.89                                                      | <b>13.61*</b>                                              | 12.57                                                           | <b>12.43</b>                                                    |
| HP19        | 13.53*                                                     | 14.14                                                      | 11.79*                                                          | 12.76                                                           |
| HP20        | 14.32                                                      | 14.56                                                      | 12.86                                                           | 13.14                                                           |

*Note.* \*=Scores below the mean minus 1 SEM, established for healthy controls on the CRTT-R-wf Score (McNeil, et al., 2015). **Bolded** = CRTT-ASL Session 2 scores that are lower than Session 1.
