# Supplementary material
Source: publisher figshare collection journal article supplement (https://asha.figshare.com/articles/dataset/_/28216259)
Supplement: Supplementary file 3 [file 1]

**Supplemental Material S6.** Post hoc “emmeans” output for mean CRTT scores.  $*p < .05$ ,  $**p < .01$ ,  $***p < .001$ . Significant comparisons are bolded. DP = Deaf proficient; HP = hearing proficient; HNP = hearing nonproficient.

| Language       | Group Contrast    | Estimate     | Standard Error | <i>df</i> | <i>t</i> -ratio | <i>p</i> -value |
|----------------|-------------------|--------------|----------------|-----------|-----------------|-----------------|
| ASL            | DP vs. HP         | -0.04        | 0.15           | 92        | -0.24           | 1.00            |
| ASL            | HNP vs. HP        | -0.30        | 0.12           | 92        | -2.46           | .15             |
| ASL            | DP vs. HNP        | 0.27         | 0.15           | 92        | 1.79            | .48             |
| <b>English</b> | <b>DP vs. HP</b>  | <b>-0.46</b> | <b>0.15</b>    | <b>92</b> | <b>-3.00</b>    | <b>.04*</b>     |
| English        | HNP vs. HP        | 0.09         | 0.12           | 92        | 0.71            | .98             |
| <b>English</b> | <b>DP vs. HNP</b> | <b>-0.54</b> | <b>0.15</b>    | <b>92</b> | <b>-3.64</b>    | <b>.006**</b>   |

*Note.*  $*p < .05$ ,  $**p < .01$ ,  $***p < .001$ . Significant comparisons are bolded. DP=Deaf proficient, HP=Hearing proficient, and HNP=Hearing non-proficient.
