# Supplementary material
Source: publisher figshare collection journal article supplement (https://asha.figshare.com/articles/dataset/_/28216259)
Supplement: Supplementary file 4 [file 1]

**Supplemental Material S7.** Post hoc “emmeans” output for mean efficiency scores.  $*p < .05$ ,  $**p < .01$ ,  $***p < .001$ . Significant comparisons are bolded. DP = Deaf proficient; HP = hearing proficient; HNP = hearing nonproficient.

| Language       | Group Contrast    | Estimate     | Standard Error | <i>df</i> | <i>t</i> -ratio | <i>p</i> -value |
|----------------|-------------------|--------------|----------------|-----------|-----------------|-----------------|
| ASL            | DP vs. HP         | -0.21        | 0.22           | 82        | -0.95           | 0.93            |
| ASL            | HNP vs. HP        | 0.09         | 0.18           | 82        | 0.51            | 1.00            |
| ASL            | DP vs. HNP        | -0.08        | 0.21           | 83        | 0.37            | 1.00            |
| <b>English</b> | <b>DP vs. HP</b>  | <b>-0.66</b> | <b>0.22</b>    | <b>82</b> | <b>-3.02</b>    | <b>0.04*</b>    |
| English        | HNP vs. HP        | 0.09         | 0.18           | 82        | 0.51            | 1.00            |
| <b>English</b> | <b>DP vs. HNP</b> | <b>-0.75</b> | <b>0.21</b>    | <b>82</b> | <b>-3.49</b>    | <b>0.01**</b>   |

*Note.*  $*p < .05$ ,  $**p < .01$ ,  $***p < .001$ . Significant comparisons are bolded. DP=Deaf proficient, HP=Hearing proficient, and HNP=Hearing non-proficient.
