# Supplementary material
Source: publisher figshare collection journal article supplement (https://asha.figshare.com/articles/dataset/_/28216259)
Supplement: Supplementary file 5 [file 1]

**Supplemental Material S1.** Scoring categories of the CRTT.

| <b><i><u>Score</u></i></b> | <b><i><u>Description of Response</u></i></b> |
|----------------------------|----------------------------------------------|
| 15                         | Correct                                      |
| 14                         | Rehearsal                                    |
| 13                         | Delay                                        |
| 12                         | Immediacy                                    |
| 11                         | Self-correct                                 |
| 10                         | Reversal                                     |
| 9                          | Repeat                                       |
| 8                          | Cue                                          |
| 7                          | Error                                        |
| 6                          | Perseveration                                |
| 5                          | Intelligible but incorrect response          |
| 4                          | Unintelligible (differentiated)              |
| 3                          | Unintelligible perseveration                 |
| 2                          | Omission                                     |
| 1                          | No Response                                  |
