# Supplementary material
Source: publisher figshare collection journal article supplement (https://asha.figshare.com/articles/dataset/_/28216259)
Supplement: Supplementary file 6 [file 1]

**Supplemental Material S12.** Hearing nonproficient (HNP) participant performance om the CRTT-R-wf across sessions. \*Scores below the mean minus 1 SEM, established for healthy controls on the CRTT-R-wf score (McNeil et al., 2015). Bolded = CRTT-ASL Session 2 scores that are lower than Session 1.

| Participant | Mean CRTT-R-wf Score<br>Timepoint 1<br>(Cutoff = 14.52) | Mean CRTT-R-wf Score<br>Timepoint 2<br>(Cutoff = 14.57) | Mean Efficiency R-wf Score<br>Timepoint 1<br>(Cutoff = 13.16) | Mean Efficiency R-wf Score<br>Timepoint 2<br>(Cutoff = 13.27) |
|-------------|---------------------------------------------------------|---------------------------------------------------------|---------------------------------------------------------------|---------------------------------------------------------------|
| HNP01       | 14.64                                                   | <b>14.61</b>                                            | 13.40                                                         | <b>13.34</b>                                                  |
| HNP02       | 14.90                                                   | 14.90                                                   | 13.70                                                         | 13.84                                                         |
| HNP03       | 14.63                                                   | 14.76                                                   | 13.15*                                                        | 13.39                                                         |
| HNP04       | 14.46                                                   | 14.66                                                   | 13.25                                                         | 13.49                                                         |
| HNP05       | 14.64                                                   | 14.73                                                   | 13.40                                                         | 13.67                                                         |
| HNP06       | 14.82                                                   | 14.89                                                   | 13.73                                                         | 13.84                                                         |
| HNP07       | 14.82                                                   | <b>14.18*</b>                                           | 13.73                                                         | <b>12.95*</b>                                                 |
| HNP08       | 14.60                                                   | 14.80                                                   | 13.60                                                         | 13.77                                                         |
| HNP09       | 14.69                                                   | 14.77                                                   | 13.40                                                         | 13.66                                                         |
| HNP10       | 14.60                                                   | 14.74                                                   | 12.97*                                                        | 13.39                                                         |
| HNP11       | 14.89                                                   | <b>14.82</b>                                            | 13.62                                                         | <b>13.60</b>                                                  |
| HNP12       | 14.45*                                                  | 14.59                                                   | 12.78*                                                        | 13.25*                                                        |
| HNP13       | 14.67                                                   | 14.82                                                   | 13.33                                                         | 13.60                                                         |
| HNP14       | 14.47*                                                  | <b>14.46*</b>                                           | 13.26                                                         | 13.16*                                                        |
| HNP15       | 14.17*                                                  | 14.57                                                   | 12.60*                                                        | 13.32                                                         |
| HNP16       | 14.38*                                                  | 14.40*                                                  | 13.37                                                         | <b>13.17*</b>                                                 |
| HNP17       | 14.64                                                   | 14.64                                                   | 13.48                                                         | 13.55                                                         |
| HNP18       | 14.63                                                   | <b>14.60</b>                                            | 13.45                                                         | 13.58                                                         |
| HNP19       | 14.45*                                                  | <b>14.43*</b>                                           | 12.77*                                                        | 12.78                                                         |
| HNP20       | 14.76                                                   | 14.76                                                   | 13.69                                                         | <b>13.50</b>                                                  |

*Note.* \*=Scores below the mean minus 1 SEM, established for healthy controls on the CRTT-R-wf Score (McNeil, et al., 2015). **Bolded**= CRTT-ASL Session 2 scores that are lower than Session 1.
