# Supplementary material
Source: publisher figshare collection journal article supplement (https://asha.figshare.com/articles/dataset/_/28216259)
Supplement: Supplementary file 7 [file 1]

**Supplemental Material S11.** Deaf proficient (DP) participant performance on the CRTT-R-wf across sessions. \*Scores below the mean minus 1 SEM, established for healthy controls on the CRTT-R-wf score (McNeil et al., 2015). Bolded = CRTT-ASL Session 2 scores that are lower than Session 1.

| Participant | Mean CRTT-R-wf Score<br>Timepoint 1<br>(Cutoff = 13.90) | Mean CRTT-R-wf Score<br>Timepoint 2<br>(Cutoff = 14.06) | Mean Efficiency R-wf Score<br>Timepoint 1<br>(Cutoff = 12.41) | Mean Efficiency R-wf Score<br>Timepoint 2<br>(Cutoff = 12.67) |
|-------------|---------------------------------------------------------|---------------------------------------------------------|---------------------------------------------------------------|---------------------------------------------------------------|
| DP01        | 14.17                                                   | 14.71                                                   | 12.88                                                         | 13.51                                                         |
| DP02        | 13.65*                                                  | 14.04*                                                  | 11.65*                                                        | 11.96*                                                        |
| DP03        | 14.42                                                   | 14.68                                                   | 12.94                                                         | 13.40                                                         |
| DP04        | 14.05                                                   | <b>13.98*</b>                                           | 12.93                                                         | 12.97                                                         |
| DP05        | 14.79                                                   | <b>14.69</b>                                            | 13.48                                                         | 13.49                                                         |
| DP06        | 14.00                                                   | <b>13.99*</b>                                           | 12.44                                                         | 12.77                                                         |
| DP07        | 14.06                                                   | 14.18                                                   | 12.65                                                         | 12.91                                                         |
| DP08        | 14.33                                                   | 14.66                                                   | 13.15                                                         | 13.29                                                         |
| DP09        | 14.33                                                   | <b>14.15</b>                                            | 13.24                                                         | <b>13.00</b>                                                  |
| DP10        | 12.93*                                                  | 13.23*                                                  | 10.44*                                                        | 11.09*                                                        |

*Note.* \*=Scores below the mean minus 1 SEM, established for healthy controls on the CRTT-R-wf Score (McNeil, et al., 2015). **Bolded**=CRTT-ASL Session 2 scores that are lower than Session 1.
