# Supplementary material
Source: publisher figshare collection journal article supplement (https://asha.figshare.com/articles/dataset/_/28216259)
Supplement: Supplementary file 8 [file 1]

**Supplemental Material S9.** Hearing nonproficient (HNP) participant performance on the CRTT-ASL across sessions. \*Scores below the mean minus 1 SEM, established for healthy controls on the CRTT-R-wf score (McNeil et al., 2015). Bolded = CRTT-ASL Session 2 scores that are lower than Session 1.

| Participant | Mean CRTT-<br>ASL Score<br>Timepoint 1<br>(Cutoff = 13.25) | Mean CRTT-<br>ASL Score<br>Timepoint 2<br>(Cutoff = 13.77) | Mean Efficiency<br>ASL Score<br>Timepoint 1<br>(Cutoff = 11.90) | Mean Efficiency<br>ASL Score<br>Timepoint 2<br>(Cutoff = 12.46) |
|-------------|------------------------------------------------------------|------------------------------------------------------------|-----------------------------------------------------------------|-----------------------------------------------------------------|
| HNP01       | 13.76                                                      | 13.90                                                      | 12.59                                                           | 12.75                                                           |
| HNP02       | 13.68                                                      | 14.32                                                      | 12.39                                                           | 13.03                                                           |
| HNP03       | 14.21                                                      | 14.45                                                      | 12.54                                                           | 13.11                                                           |
| HNP04       | 13.79                                                      | 14.42                                                      | 12.49                                                           | 13.12                                                           |
| HNP05       | 14.10                                                      | 14.73                                                      | 12.72                                                           | 13.80                                                           |
| HNP06       | 12.34*                                                     | 13.84                                                      | 11.29*                                                          | 12.67                                                           |
| HNP07       | 13.93                                                      | <b>13.77</b>                                               | 12.59                                                           | <b>12.55</b>                                                    |
| HNP08       | 12.84*                                                     | 14.57                                                      | 11.87*                                                          | 13.50                                                           |
| HNP09       | 14.13                                                      | 14.53                                                      | 12.87                                                           | 13.34                                                           |
| HNP10       | 12.29*                                                     | 13.58*                                                     | 11.19*                                                          | 12.27*                                                          |
| HNP11       | 14.11                                                      | <b>14.06</b>                                               | 12.80                                                           | <b>12.67</b>                                                    |
| HNP12       | 12.92*                                                     | 13.56*                                                     | 11.20*                                                          | 12.05*                                                          |
| HNP13       | 14.38                                                      | 14.49                                                      | 13.09                                                           | 13.12                                                           |
| HNP14       | 13.64                                                      | 13.94                                                      | 12.37                                                           | 12.51                                                           |
| HNP15       | 13.10*                                                     | 13.71*                                                     | 10.92*                                                          | 11.94*                                                          |
| HNP16       | 13.29                                                      | 13.99                                                      | 11.94                                                           | 12.82                                                           |
| HNP17       | 13.53                                                      | <b>13.50*</b>                                              | 12.44                                                           | <b>12.32*</b>                                                   |
| HNP18       | 13.98                                                      | 14.49                                                      | 12.82                                                           | 13.35                                                           |
| HNP19       | 13.90                                                      | 14.18                                                      | 12.05                                                           | 12.51                                                           |
| HNP20       | 14.35                                                      | 14.53                                                      | 13.16                                                           | 13.27                                                           |

*Note.* \*=Scores below the mean minus 1 SEM, established for healthy controls on the CRTT-R-wf Score (McNeil, et al., 2015). **Bolded**= CRTT-ASL Session 2 scores that are lower than Session 1.
