# Supplementary material
Source: publisher figshare collection journal article supplement (https://asha.figshare.com/articles/dataset/_/28216259)
Supplement: Supplementary file 9 [file 1]

**Supplemental Material S3.** Descriptions of ASL linguistic characteristics for a subset of the CRTT commands.

| Subtest | Command                                                             | Linguistic Elements                                             |
|---------|---------------------------------------------------------------------|-----------------------------------------------------------------|
| 1       | “Touch the black circle.”                                           | Mouthing                                                        |
| 2       | “Touch the big green circle.”                                       | Mouthing                                                        |
| 3       | “Touch the green square and the black square.”                      | Mouthing, Role Shift/Topic Change                               |
| 4       | “Touch the big blue circle and the little green square.”            | Mouthing, Role Shift/Topic Change                               |
| 5       | “Put the black circle above the white square.”                      | Mouthing, Role Shift/Topic Change, Directional Sign             |
| 6       | “Put the big red square in front of the big white circle.”          | Mouthing, Role Shift/Topic Change, Directional Sign, Rhetorical |
| 7       | “Put the black circle to the left of the white square.”             | Mouthing, Role Shift/Topic Change, Directional Sign, Rhetorical |
| 8       | “Put the little white square to the right of the big green circle.” | Mouthing, Role Shift/Topic Change, Directional Sign, Rhetorical |
| 9       | “Unless you have touched the white square, touch the green circle.” | Mouthing, Topic Change, Yes/No Question                         |
| 10      | “Touch the little blue square if there is a big black circle.”      | Mouthing, Topic Change, Yes/No Question                         |
