# Supplementary material
Source: publisher figshare collection journal article supplement (https://asha.figshare.com/articles/dataset/_/28216259)
Supplement: Supplementary file 10 [file 1]

**Supplemental Material S2.** Example commands from each subtest of the CRTT.

| <i><b>Subtest</b></i> | <i><b>Command</b></i>                                          |
|-----------------------|----------------------------------------------------------------|
| 1                     | Touch the black circle.                                        |
| 2                     | Touch the big green circle.                                    |
| 3                     | Touch the green square and the black square.                   |
| 4                     | Touch the big green square and the little black square.        |
| 5                     | Put the black square by the red circle.                        |
| 6                     | Put the big black square above the little red circle.          |
| 7                     | Put the black circle to the left of the white square.          |
| 8                     | Put the little green circle to the left of the big red square. |
| 9                     | Instead of the green square, touch the black square.           |
| 10                    | Touch the little blue square if there is a big black circle.   |
