# Supplementary material
Source: publisher figshare collection journal article supplement (https://asha.figshare.com/articles/dataset/_/28216259)
Supplement: Supplementary file 11 [file 1]

**Supplemental Material S13.** Hearing proficient (HP) participant performance on the CRTT-R-wf across sessions. \*Scores below the mean minus 1 SEM, established for healthy controls on the CRTT-R-wf score (McNeil et al., 2015). Bolded = CRTT-ASL Session 2 scores that are lower than Session 1.

| Participant | Mean CRTT-R-wf Score<br>Timepoint 1<br>(Cutoff = 14.42) | Mean CRTT-R-wf Score<br>Timepoint 2<br>(Cutoff = 14.52) | Mean Efficiency R-wf Score<br>Timepoint 1<br>(Cutoff = 13.11) | Mean Efficiency R-wf Score<br>Timepoint 2<br>(Cutoff = 13.27) |
|-------------|---------------------------------------------------------|---------------------------------------------------------|---------------------------------------------------------------|---------------------------------------------------------------|
| HP01        | 14.47                                                   | 14.66                                                   | 12.98*                                                        | 13.12*                                                        |
| HP02        | 14.74                                                   | 14.81                                                   | 13.26                                                         | 13.50                                                         |
| HP03        | 14.69                                                   | 14.69                                                   | 13.52                                                         | <b>13.44</b>                                                  |
| HP04        | 13.96*                                                  | 14.17*                                                  | 12.49*                                                        | 12.78*                                                        |
| HP05        | 14.53                                                   | 14.58                                                   | 13.12                                                         | 13.37                                                         |
| HP06        | 14.72                                                   | 14.76                                                   | 13.55                                                         | 13.62                                                         |
| HP07        | 14.66                                                   | 14.76                                                   | 13.25                                                         | 13.62                                                         |
| HP08        | 14.77                                                   | 14.84                                                   | 13.24                                                         | 13.49                                                         |
| HP09        | 14.62                                                   | 14.40*                                                  | 13.39                                                         | <b>13.25*</b>                                                 |
| HP10        | 14.12*                                                  | <b>14.48*</b>                                           | 12.72*                                                        | 13.15*                                                        |
| HP11        | 13.94*                                                  | 14.30*                                                  | 12.68*                                                        | 13.08*                                                        |
| HP12        | 14.45                                                   | 14.60                                                   | 13.53                                                         | 13.64                                                         |
| HP13        | 14.61                                                   | 14.81                                                   | 13.45                                                         | 13.77                                                         |
| HP14        | 14.51                                                   | 14.81                                                   | 13.40                                                         | 13.74                                                         |
| HP15        | 14.57                                                   | 14.71                                                   | 13.45                                                         | 13.55                                                         |
| HP16        | 14.74                                                   | <b>14.69</b>                                            | 13.37                                                         | <b>13.33</b>                                                  |
| HP17        | 14.64                                                   | <b>14.58</b>                                            | 13.27                                                         | 13.31                                                         |
| HP18        | 14.64                                                   | 14.78                                                   | 13.48                                                         | 13.67                                                         |
| HP19        | 14.66                                                   | <b>14.47*</b>                                           | 13.30                                                         | <b>13.15*</b>                                                 |
| HP20        | 14.64                                                   | 14.78                                                   | 13.14                                                         | 13.34                                                         |

*Note.* \*=Scores below the mean minus 1 SEM, established for healthy controls on the CRTT-R-wf Score (McNeil, et al., 2015). **Bolded**=CRTT-ASL Session 2 scores that are lower than Session 1.
