# Supplementary material
Source: publisher figshare collection journal article supplement (https://asha.figshare.com/articles/dataset/_/28216259)
Supplement: Supplementary file 12 [file 1]

**Supplemental Material S4.** Deaf proficient (DP) participant hearing and language background information.

| Participant | Language used by parents                 | Age of ASL exposure (years) | Educational Setting           | Hearing Loss Classification | Use of aided technology? | Age of hearing technology onset |
|-------------|------------------------------------------|-----------------------------|-------------------------------|-----------------------------|--------------------------|---------------------------------|
| DP01        | Signed Exact English & home signs        | 1                           | Deaf School / Mainstream Oral | Profound                    | No                       | n/a                             |
| DP02        | English                                  | 10                          | Deaf School / Mainstream Oral | Profound                    | Yes (hearing aids & CIs) | HA: 2 years<br>CI: 3 years      |
| DP03        | ASL / Oral English                       | Birth                       | Mainstream Oral               | Profound                    | No                       | n/a                             |
| DP04        | SEE                                      | 2                           | Mainstream Oral               | Profound                    | Yes                      | 14                              |
| DP05        | Pidgin Sign English / ASL                | 2                           | Mainstream Oral               | Profound                    | Yes                      | 2                               |
| DP06        | Oral English / ASL                       | 5                           | Mainstream Oral               | Profound                    | No                       | n/a                             |
| DP07        | Body gesture / fingerspelling / some ASL | 5                           | Deaf School / Mainstream Oral | Profound                    | Yes                      | 2                               |
| DP08        | Spoken English                           | 18                          | Deaf School / Mainstream Oral | Profound                    | Yes                      | 1                               |
| DP09        | Mother: Simcom<br>Father: Spoken English | 2                           | Deaf School / Mainstream Oral | Profound                    | Yes                      | 2                               |
| DP10        | Home sign / body gesture                 | 4                           | Deaf School                   | Profound                    | Yes                      | 4                               |
