# Supplementary material
Source: publisher figshare collection journal article supplement (https://asha.figshare.com/articles/dataset/_/28216259)
Supplement: Supplementary file 13 [file 1]

**Supplemental Material S8.** Deaf proficient (DP) participant performance on the CRTT-ASL across sessions. \*Scores below the mean minus 1 SEM, established for healthy controls on the CRTT-R-wf score (McNeil et al., 2015). Bolded = CRTT-ASL Session 2 scores that are lower than Session 1.

| Participant | Mean CRTT-<br>ASL Score<br>Timepoint 1<br>(Cutoff = 13.73) | Mean CRTT-<br>ASL Score<br>Timepoint 2<br>(Cutoff = 13.93) | Mean Efficiency<br>ASL Score<br>Timepoint 1<br>(Cutoff = 12.04) | Mean Efficiency<br>ASL Score<br>Timepoint 2<br>(Cutoff = 12.39) |
|-------------|------------------------------------------------------------|------------------------------------------------------------|-----------------------------------------------------------------|-----------------------------------------------------------------|
| DP01        | 13.96                                                      | 14.50                                                      | 12.66                                                           | 13.16                                                           |
| DP02        | 13.74                                                      | <b>13.67*</b>                                              | 11.89*                                                          | <b>11.63*</b>                                                   |
| DP03        | 14.48                                                      | 14.49                                                      | 13.13                                                           | 13.34                                                           |
| DP04        | 13.94                                                      | 14.20                                                      | 12.61                                                           | 12.96                                                           |
| DP05        | 14.31                                                      | <b>14.18</b>                                               | 12.93                                                           | <b>12.78</b>                                                    |
| DP06        | 13.18*                                                     | 13.79*                                                     | 11.16*                                                          | 12.48                                                           |
| DP07        | 13.86                                                      | 14.28                                                      | 12.45                                                           | 13.19                                                           |
| DP08        | 14.47                                                      | 14.48                                                      | 13.19                                                           | <b>13.14</b>                                                    |
| DP09        | 13.67*                                                     | 13.98                                                      | 12.31                                                           | 12.84                                                           |
| DP10        | 13.52*                                                     | <b>13.51*</b>                                              | 11.40*                                                          | 11.71*                                                          |

*Note.* \* = Scores below the mean minus 1 SEM, established for healthy controls on the CRTT-R-wf Score (McNeil, et al., 2015). **Bolded** = CRTT-ASL Session 2 scores that are lower than Session 1.
